# Supplementary material
Source: publisher figshare collection journal article supplement (https://sage.figshare.com/ndownloader/files/22964006)
Supplement: Supplementary file 1 [file 22964006]

Table S2 GO enrichment analysis in biological process

| GO-BP      | ID         | Description                                      | GeneRatio | BgRatio   | pvalue     | p.adjust   | qvalue     | geneID                          | Count |
|------------|------------|--------------------------------------------------|-----------|-----------|------------|------------|------------|---------------------------------|-------|
| GO:1901861 | GO:1901861 | regulation of muscle tissue development          | 5/47      | 175/23239 | 2.72E-05   | 0.00782418 | 0.00609908 | Igfbp5/Ncam1/Tgfb3/Smad4/Gja1   | 5     |
| GO:0001649 | GO:0001649 | osteoblast differentiation                       | 5/47      | 192/23239 | 4.23E-05   | 0.00782418 | 0.00609908 | Igfbp5/Tgfb3/Col1a1/Smad4/Gja1  | 5     |
| GO:0048762 | GO:0048762 | mesenchymal cell differentiation                 | 5/47      | 213/23239 | 6.92E-05   | 0.00853643 | 0.00665429 | Tgfb3/Col1a1/Tgfb1i1/Smad4/Gja1 | 5     |
| GO:0060485 | GO:0060485 | mesenchyme development                           | 5/47      | 269/23239 | 0.00020643 | 0.01909453 | 0.0148845  | Tgfb3/Col1a1/Tgfb1i1/Smad4/Gja1 | 5     |
| GO:0051147 | GO:0051147 | regulation of muscle cell differentiation        | 4/47      | 159/23239 | 0.0002993  | 0.0221481  | 0.0172648  | Ptbp1/Cxcl12/Cd8/Smad4          | 4     |
| GO:0016202 | GO:0016202 | regulation of striated muscle tissue development | 4/47      | 172/23239 | 0.00040324 | 0.02324811 | 0.01812228 | Ncam1/Tgfb3/Smad4/Gja1          | 4     |
| GO:0048634 | GO:0048634 | regulation of muscle organ development           | 4/47      | 176/23239 | 0.00043983 | 0.02324811 | 0.01812228 | Ncam1/Tgfb3/Smad4/Gja1          | 4     |
| GO:0048771 | GO:0048771 | tissue remodeling                                | 4/47      | 187/23239 | 0.00055264 | 0.02555944 | 0.019924   | Igfbp5/Tgfb3/Ctsk/Gja1          | 4     |
| GO:0007411 | GO:0007411 | axon guidance                                    | 4/47      | 223/23239 | 0.00106546 | 0.0400798  | 0.03124286 | Cxcl12/Ncam1/Alcam/Smad4        | 4     |
| GO:0097485 | GO:0097485 | neuron projection guidance                       | 4/47      | 224/23239 | 0.00108324 | 0.0400798  | 0.03124286 | Cxcl12/Ncam1/Alcam/Smad4        | 4     |
| GO:0033002 | GO:0033002 | muscle cell proliferation                        | 4/47      | 231/23239 | 0.00121356 | 0.04081971 | 0.03181963 | Igfbp5/Ncam1/Tgfb3/Gja1         | 4     |
| GO:0030198 | GO:0030198 | extracellular matrix organization                | 4/47      | 248/23239 | 0.00157521 | 0.04822661 | 0.03759343 | Col24a1/Col1a1/Postn/Efemp2     | 4     |
| GO:0048738 | GO:0048738 | cardiac muscle tissue development                | 4/47      | 253/23239 | 0.00169445 | 0.04822661 | 0.03759343 | Ncam1/Tgfb3/Smad4/Gja1          | 4     |

Table S3 KEGG enrichment analysis

| KEGG     | ID       | Description                                          | GeneRatio | BgRatio  | pvalue      | p.adjust    | qvalue      | geneID                        | Count |
|----------|----------|------------------------------------------------------|-----------|----------|-------------|-------------|-------------|-------------------------------|-------|
| mmu04142 | mmu04142 | Lysosome                                             | 5/23      | 124/8613 | 1.56E-05    | 0.001263127 | 0.001001309 | 83429/13038/11593/16004/12514 | 5     |
| mmu05323 | mmu05323 | Rheumatoid arthritis                                 | 4/23      | 84/8613  | 6.47E-05    | 0.002621406 | 0.002078048 | 20315/15894/13038/16414       | 4     |
| mmu04514 | mmu04514 | Cell adhesion molecules (CAMs)                       | 4/23      | 171/8613 | 0.000988848 | 0.020592632 | 0.016324243 | 17967/15894/11658/16414       | 4     |
| mmu00511 | mmu00511 | Other glycan degradation                             | 2/23      | 18/8613  | 0.00101692  | 0.020592632 | 0.016324243 | 11593/217364                  | 2     |
| mmu04512 | mmu04512 | ECM-receptor interaction                             | 3/23      | 86/8613  | 0.001473384 | 0.023868824 | 0.018921355 | 319480/21923/12842            | 3     |
| mmu04933 | mmu04933 | AGE-RAGE signaling pathway in diabetic complications | 3/23      | 101/8613 | 0.002337462 | 0.027555859 | 0.021844151 | 15894/12842/17128             | 3     |
| mmu04810 | mmu04810 | Regulation of actin cytoskeleton                     | 4/23      | 217/8613 | 0.002381371 | 0.027555859 | 0.021844151 | 319480/20315/73178/16414      | 4     |
| mmu04670 | mmu04670 | Leukocyte transendothelial migration                 | 3/23      | 115/8613 | 0.003379856 | 0.034221045 | 0.027127794 | 20315/15894/16414             | 3     |

Table S4 Upregulated or downregulated proteins in KEGG enrichment pathways

| Rheumatoid arthritis |            |          |
|----------------------|------------|----------|
|                      | logFC      | P.Value  |
| Cxcl12               | 1.65125169 | 5.11E-12 |
| Icam1                | 1.48058856 | 1.62E-09 |
| CTSk                 | 1.16418106 | 5.10E-09 |
| Itgb2                | 1.10142719 | 1.09E-07 |

| Cell adhesion molecules (CAMs) |            |          |
|--------------------------------|------------|----------|
|                                | logFC      | P.Value  |
| Ncam1                          | 1.60588612 | 1.68E-11 |
| Icam1                          | 1.48058856 | 1.62E-09 |
| Alcam                          | -1.3401928 | 4.64E-09 |
| Itgb2                          | 1.10142719 | 1.09E-07 |

| ECM-receptor interaction |            |          |
|--------------------------|------------|----------|
|                          | logFC      | P.Value  |
| Itga11                   | -2.7695619 | 2.90E-15 |
| Tnc                      | 1.49813768 | 4.35E-10 |
| Col1a1                   | 1.18545023 | 7.59E-09 |

| Regulation of actin cytoskeleton |            |          |
|----------------------------------|------------|----------|
|                                  | logFC      | P.Value  |
| Itga11                           | -2.7695619 | 2.90E-15 |
| Cxcl12                           | 1.65125169 | 5.11E-12 |
| Wasl                             | 1.21424908 | 3.77E-08 |
| Itgb2                            | 1.10142719 | 1.09E-07 |

| Leukocyte transendothelial migration |            |          |
|--------------------------------------|------------|----------|
|                                      | logFC      | P.Value  |
| Cxcl12                               | 1.65125169 | 5.11E-12 |
| Icam1                                | 1.48058856 | 1.62E-09 |
| Itgb2                                | 1.10142719 | 1.09E-07 |
